# Supplementary material
Source: PubMed Central journal article supplement (PMC5913996)
Supplement: AAC.02004-17_zac004187002s1.pdf [file AAC.02004-17_zac004187002s1.pdf]

## SUPPLEMENTAL MATERIAL

| Dose                                                                   | 24 h-interval |       | 36 h-interval |       | 48 h-interval |       | 72 h-interval |       |
|------------------------------------------------------------------------|---------------|-------|---------------|-------|---------------|-------|---------------|-------|
|                                                                        | Day 1         | Day 7 |
| Proportion of patient with target trough concentrations $\geq 1$ mg/L  |               |       |               |       |               |       |               |       |
| 4 mg/kg                                                                | 40            | 49    | 8             | 15    | 1             | 4     | 0             | 0     |
| 7.5 mg/kg                                                              | 75            | 77    | 35            | 40    | 13            | 17    | 1             | 3     |
| Proportion of patients with target trough concentrations $\geq 2$ mg/L |               |       |               |       |               |       |               |       |
| 4 mg/kg                                                                | 4             | 16    | 0             | 2     | 0             | 0     | 0             | 0     |
| 7.5 mg/kg                                                              | 36            | 46    | 6             | 13    | 0             | 3     | 0             | 0     |

**Table S1:** Proportion of patients with target trough concentrations of  $\geq 1$  mg/L and  $\geq 2$  mg/L for dosing intervals after first dose first and after one week of treatment. The same dosing regimen is given to the entire population.

| AUC/MIC ratio | % Neonates achieving ratio<br>after 4 mg/kg per 24h/36h<br>(MIC 0.5 mg/L) | % Neonates achieving ratio<br>after 7.5 mg/kg per 36h/48h<br>(MIC 1.0 mg/L) |
|---------------|---------------------------------------------------------------------------|-----------------------------------------------------------------------------|
|               | $\geq 37$                                                                 | 99.8                                                                        |
| $\geq 67$     | 94.4                                                                      | 94.6                                                                        |
| $\geq 80$     | 88.2                                                                      | 89.1                                                                        |

**Table S2:** Proportion of patients achieving AUC/MIC ratios, as proposed by Nielsen et al. (1) or Turnidge et al. (2) after 4 mg/kg or 7.5 mg/kg dose according to different subgroups based on PNA and GA. AUC; area under the curve, MIC; minimum inhibition concentration, PNA; postnatal age, GA; gestational age.

| Pathogen                        | MIC breakpoint (mg/L) |
|---------------------------------|-----------------------|
| Enterobacteriaceae              | 2.0                   |
| Pseudomonas spp.                | 4.0                   |
| Acinetobacter spp.              | 4.0                   |
| Staphylococcus spp. (s. aureus) | 1.0                   |
| Staphylococcus spp. (CoNS)      | 1.0                   |

**Table S3:** Pathogens with their corresponding minimum inhibitory concentrations breakpoints (MIC). Source: EUCAST; Clinical breakpoints, (Update 2017-03-13).

**Germovsek *et al.* model prediction comparison according to two other models:**

Concentration predictions based on Germovsek *et al.* model were compared to two other model predictions. The model of Nielsen *et al.* 2009 and Fuchs *et al.* 2014 were chosen as they included gestational age on volume of distribution. A two-compartmental model was used (Fuchs *et al.*) vs. three-compartmental model (Germovsek *et al.* and Nielsen *et al.*) to investigate whether the difference in distribution characterization could have influenced the predictions. Model description is presented in Table S4 and results are illustrated in figures S6-S8.

| Author                                                        | Germovsek et al.                                                                                                                         | Nielsen et al.                                                                                             | Fuchs et al.                                                                                                                  |
|---------------------------------------------------------------|------------------------------------------------------------------------------------------------------------------------------------------|------------------------------------------------------------------------------------------------------------|-------------------------------------------------------------------------------------------------------------------------------|
| <b>Data</b>                                                   | Multi-center (3), prospective data collection.<br>MB datasets with 1325 serum concentrations & ME dataset with 483 serum concentrations. | Single center, prospective data collection.<br>894 serum concentrations                                    | Single center, retrospective data collection.<br>MB dataset with 3039 serum concentrations. Not specified for ME.             |
| <b>Structure</b>                                              | 3 CMT, linear elimination.                                                                                                               | 3 CMT, linear elimination.                                                                                 | 2 CMT, linear elimination.                                                                                                    |
| <b>Population (median, [min, max])</b>                        | 205 neonates (MB)<br>163 neonates (ME) †<br>WT; 2.12 [0.53-5.05]*<br>GA; 34 [23.3-42.1]*<br>PNA; 5.4 [1-66]*<br>PMA; 33 [23.3-43.8]*     | 61 newborns<br>WT; 1.4 [0.495- 5.05]<br>GA; 28.9 [23.3-42.1]<br>PNA; 1 [0-45]<br>PMA; not specified        | 1449 neonates (MB)<br>69 neonates (ME)<br>WT; 2.17 [4.4-5.51]*<br>GA; 34 [24-42]*<br>PNA; 1 [1-94]*<br>PMA; 34.4 [24.2-42.4]* |
| <b>Covariates included</b>                                    | WT, PMA, PNA, SCr on CL.<br>WT on V.                                                                                                     | WT, GA, PNA on CL.<br>WT, GA on V.                                                                         | WT, GA, PNA, DOPA on CL.<br>WT, GA on V.                                                                                      |
| <b>Identified IIV (CV %)</b>                                  | CL (41.8), V (33.5), V2 (36.3), V3 (42.1)                                                                                                | CL (21.6).                                                                                                 | CL (28), V (18).                                                                                                              |
| <b>Parameter estimates ARPEC dataset (median, [min, max])</b> | CL; 0.098 [0.008, 0.899]<br>V1; 0.8 [0.1, 3.3]<br>Cmax; 15.6 [5.7, 35.6] ‡<br>Cmin; 0.5 [0.009, 2.898] ‡                                 | CL; 0.098 [0.005, 0.618])<br>V1; 0.8 [0.2, 1.8]<br>Cmax; 16.1 [11.4, 19.6] ‡<br>Cmin; 0.3 [0.005, 1.944] ‡ | CL; 0.12 [0.006, 0.761]<br>V1; 0.9 [0.2, 3.0]<br>Cmax; 14.2 [6.9, 34.8] ‡<br>Cmin; 0.4 [0.005, 4.452] ‡                       |
| <b>Notes</b>                                                  | Data from Nielsen et al., Thomson et al. and Methsvaht et al. (unpublished) used for MB                                                  | Data used in the MB of Germovsek et al.                                                                    |                                                                                                                               |

**Table S4:** MB; model building, ME; model evaluation, CMT; compartment, WT; weight (kg), GA; gestational age (weeks), PNA; post-natal age (days), PMA; post menstrual age (weeks), SCr; serum creatinine concentration ( $\mu\text{mol/L}$ ), DOPA; Dopamine, CL; Clearance (L/h), V; Volume of distribution (L), IIV; inter-individual variability. \* MB population characteristics. † Prospective collection from five hospitals. ‡ Cmax and Cmin concentrations after 7.5 mg/kg dose every 36h or 48h based on PNA (7 days) and GA (28 weeks).

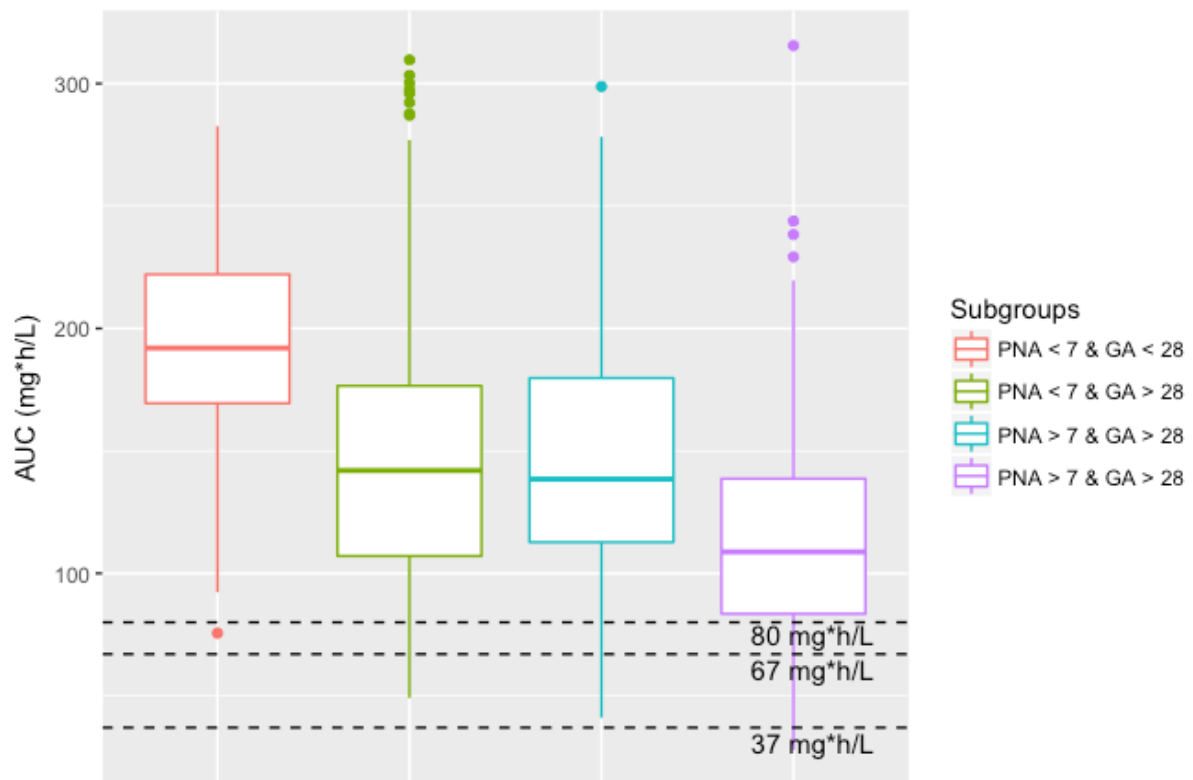

**Figure S1:** Distribution of area under the curve after single 7.5 mg/kg gentamicin dose over 48h interval (PNA < 7 days or PNA  $\geq$  7 days & GA  $\leq$  28 weeks) or 36h interval (PNA  $\geq$  7 days & GA > 28 weeks). AUC; area under the curve, PNA; post-natal age, GA; gestational age. Boxes represent the interquartile range (IQR) solid lines are the median, 25<sup>th</sup> and 75<sup>th</sup> quantile and whiskers equal 25<sup>th</sup> quantile - 1.5 IQR and 75<sup>th</sup> quantile +1.5 IQR.

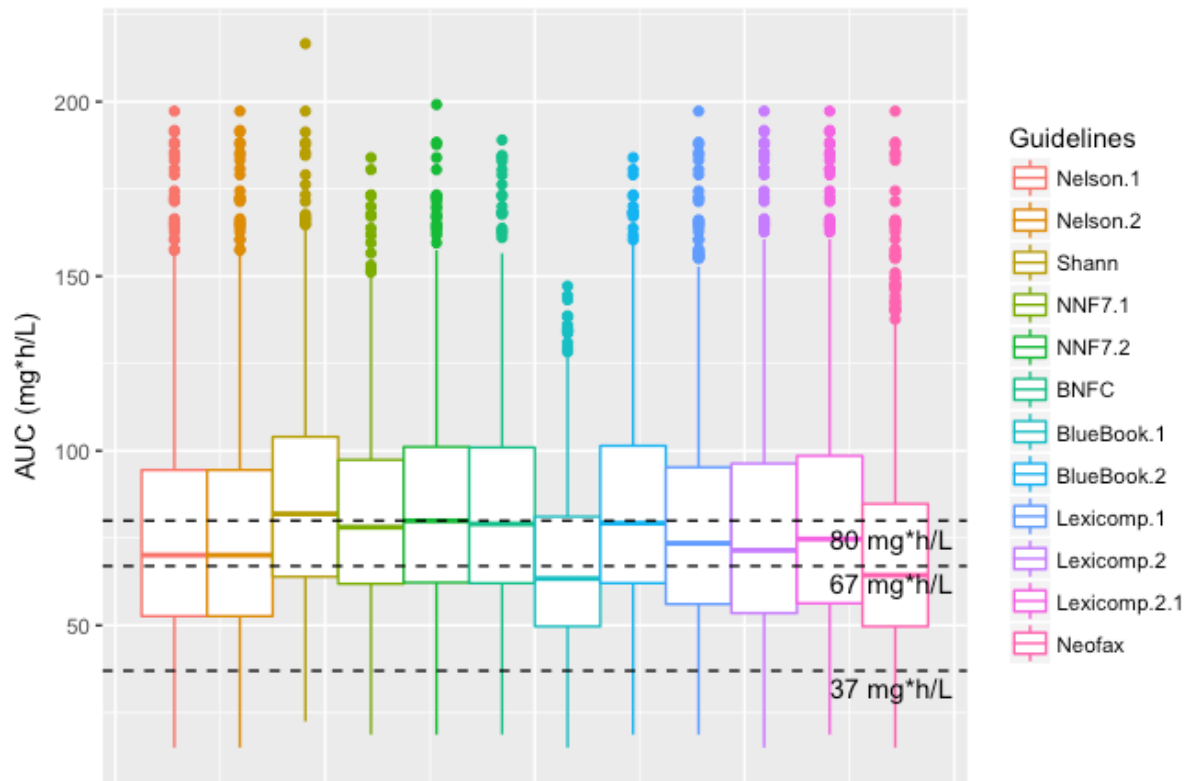

**Figure S2:** Distribution of area under the curve according to dosing regimen applied in international guidelines. Boxes represent the interquartile range (IQR) solid lines are the median, 25<sup>th</sup> and 75<sup>th</sup> quantile and whiskers equal 25<sup>th</sup> quantile - 1.5 IQR and 75<sup>th</sup> quantile +1.5 IQR. AUC; area under the curve, BNFC; British National Formulary for Children, Blue Book; Manual of childhood infections Blue Book, Nelson; Nelson Textbook of Pediatrics, NNF7; Neonatal Formulary 7<sup>th</sup> edition, Lexicomp; Lexicomp Pediatric & Neonatal Dosage Handbook, Red Book; Red Book report of the Committee on Infectious Diseases, Shann; Frank Shann Drug Doses.

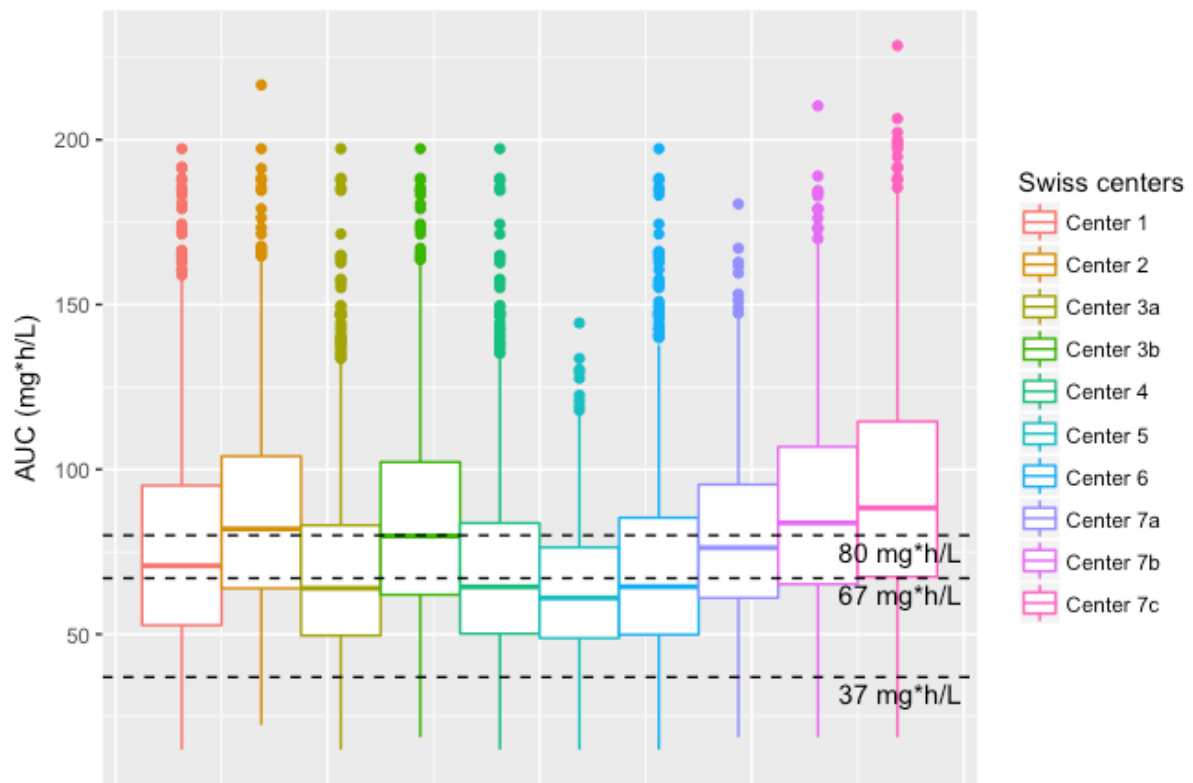

**Figure S3:** Distribution of area under the curve (AUC) according to dosing regimen applied in Swiss centers. Boxes represent the interquartile range (IQR) solid lines are the median, 25<sup>th</sup> and 75<sup>th</sup> quantile and whiskers equal 25<sup>th</sup> quantile - 1.5 IQR and 75<sup>th</sup> quantile +1.5 IQR.

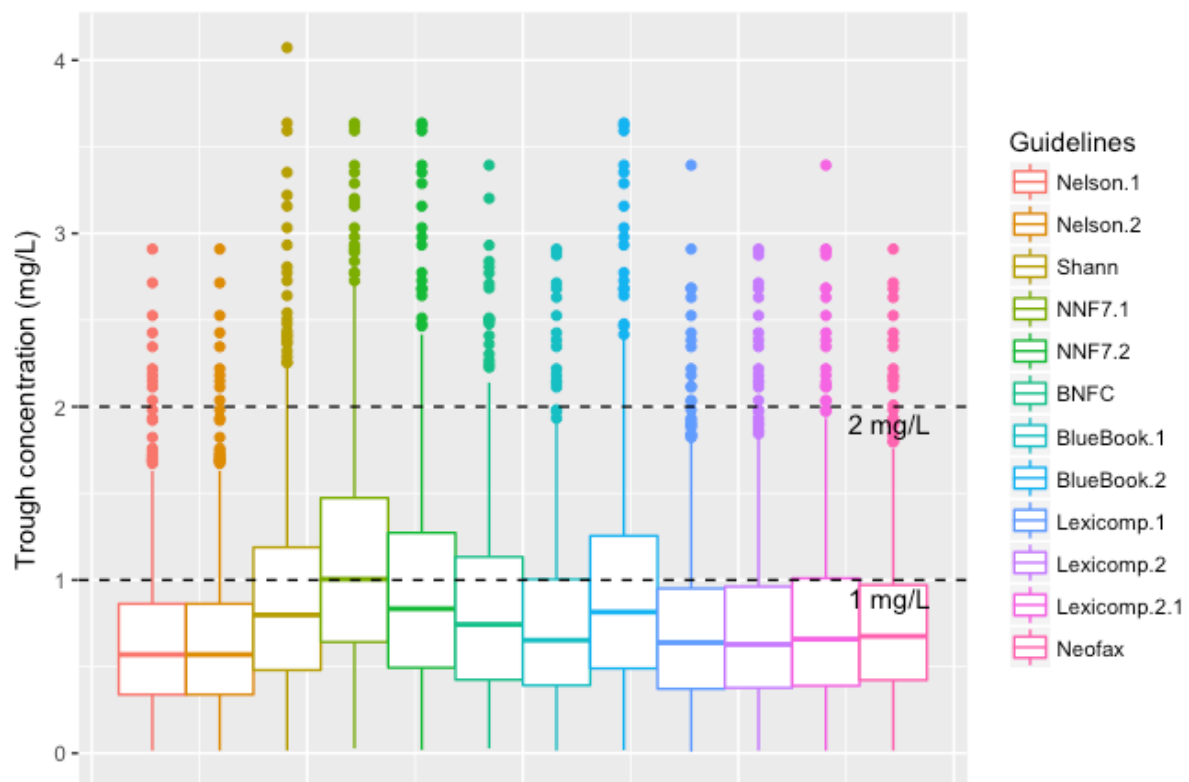

**Figure S4:** Distribution of simulated trough concentrations according to dosing regimen applied in international guidelines. Boxes represent the interquartile range (IQR) solid lines are the median, 25<sup>th</sup> and 75<sup>th</sup> quantile and whiskers equal 25<sup>th</sup> quantile - 1.5 IQR and 75<sup>th</sup> quantile +1.5 IQR. BNFC; British National Formulary for Children, Blue Book; Manual of childhood infections Blue Book, Nelson; Nelson Textbook of Pediatrics, NNF7; Neonatal Formulary 7<sup>th</sup> edition, Lexicomp; Lexicomp Pediatric & Neonatal Dosage Handbook, Red Book; Red Book report of the Committee on Infectious Diseases, Shann; Frank Shann Drug Doses.

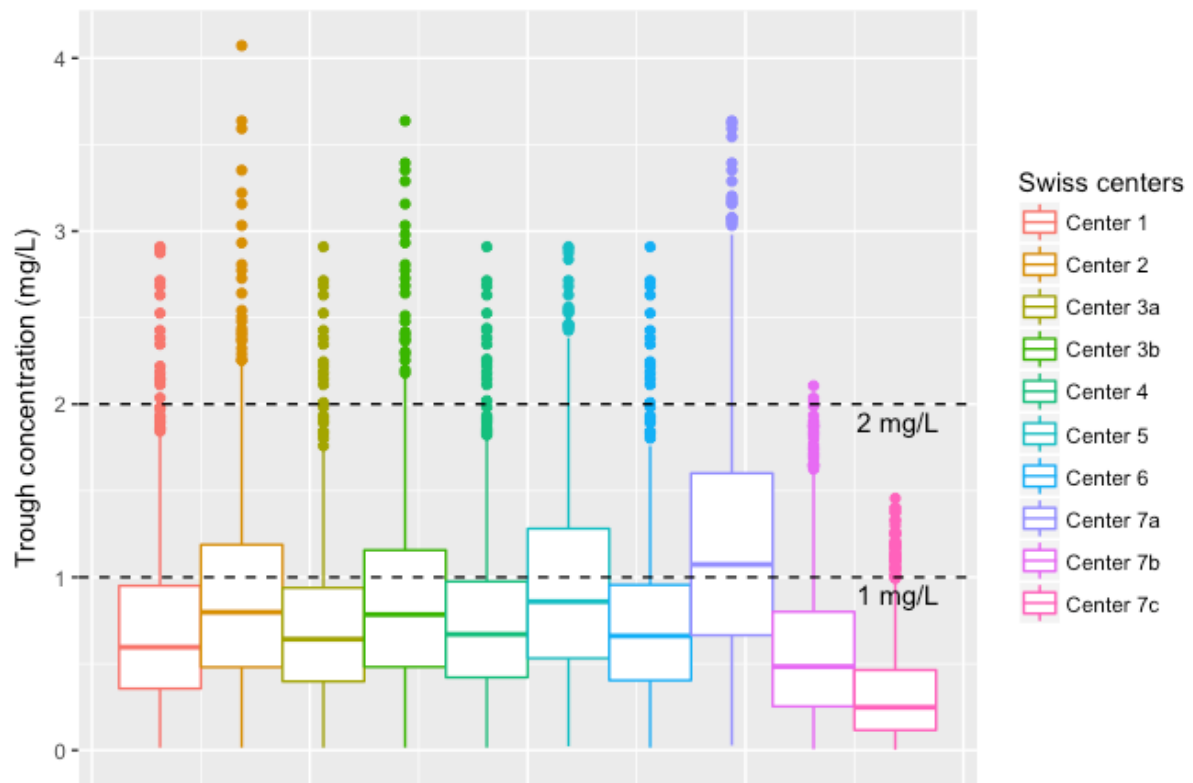

**Figure S5:** Distribution of simulated trough concentrations according to dosing regimen applied in Swiss centers. Boxes represent the interquartile range (IQR) solid lines are the median, 25<sup>th</sup> and 75<sup>th</sup> quantile and whiskers equal 25<sup>th</sup> quantile - 1.5 IQR and 75<sup>th</sup> quantile +1.5 IQR.



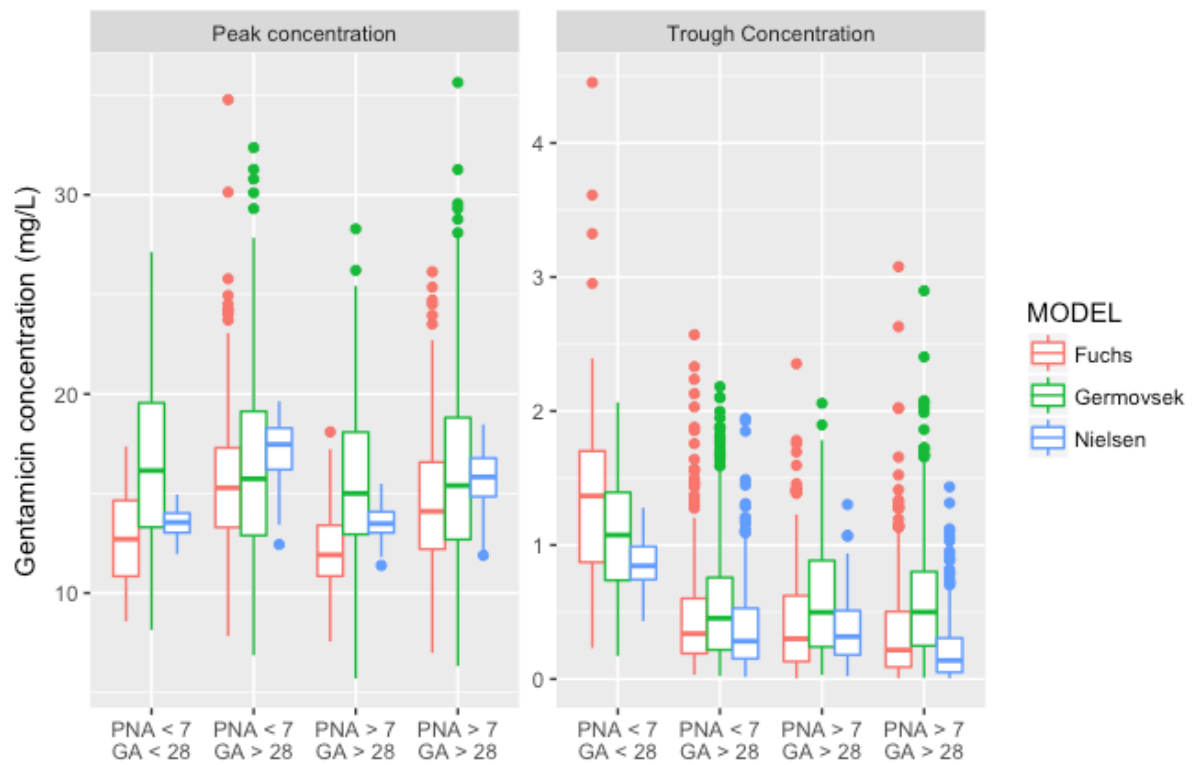

**Figure S6:** Distribution of peak and trough concentration after single 7.5 mg/kg gentamicin dose over 48h interval (PNA < 7 days or PNA  $\geq$  7 days & GA  $\leq$  28 weeks) or 36h interval (PNA  $\geq$  7 days & GA > 28 weeks) for three different gentamicin PK models. PNA; post-natal age, GA; gestational age. Boxes represent the interquartile range (IQR), solid lines are the median, 25<sup>th</sup> and 75<sup>th</sup> quantile and whiskers equal 25<sup>th</sup> quantile -1.5 IQR and 75<sup>th</sup> quantile + 1.5 IQR.

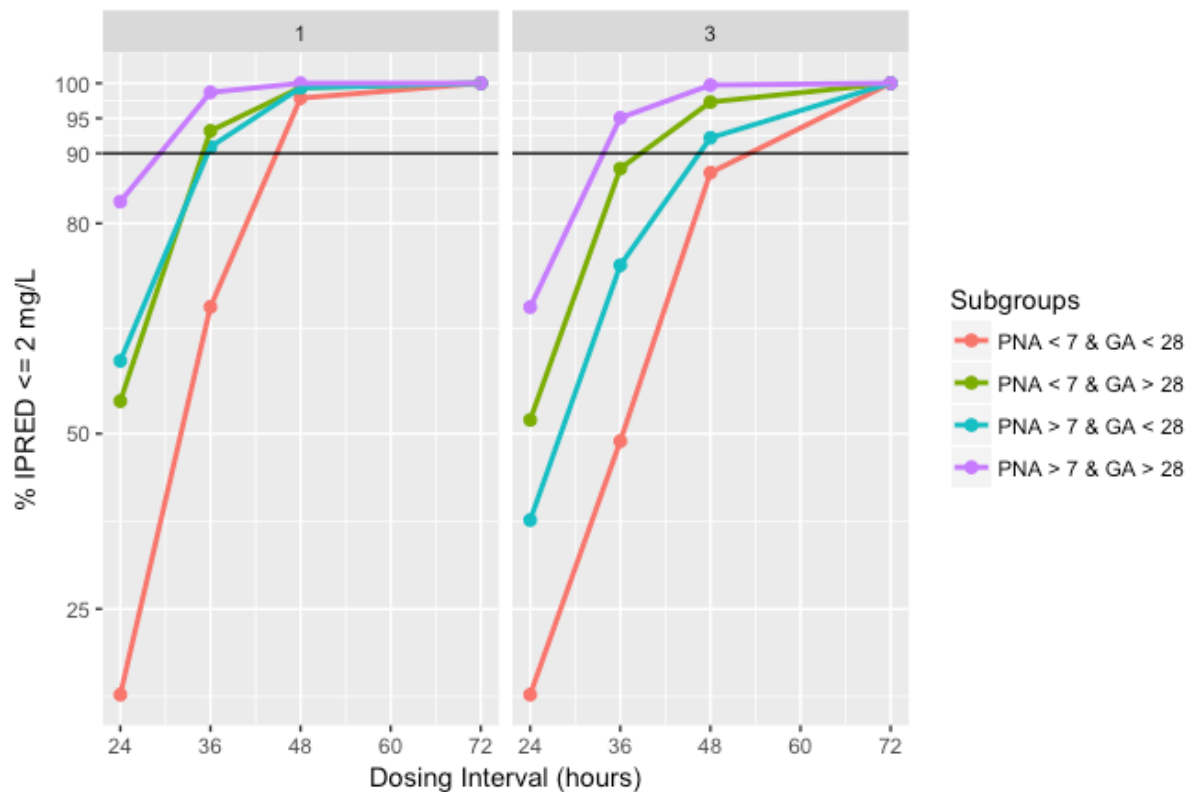

**Figure S7:** Percentage of patients achieving trough levels above 2 mg/L after first dose (1) or one week of treatment (3). Different colors represent subgroups after single 7.5 mg/kg gentamicin dose over 48h interval (PNA < 7 days or PNA  $\geq$  7 days & GA  $\leq$  28 weeks) or 36h interval (PNA  $\geq$  7 days & GA > 28 weeks). IPRED; Individual concentration predictions, PNA; post-natal age, GA; gestational age.

1. **Nielsen EI, Cars O, Friberg LE.** 2011. Pharmacokinetic/pharmacodynamic (PK/PD) indices of antibiotics predicted by a semimechanistic PKPD model: a step toward model-based dose optimization. *Antimicrobial agents and chemotherapy* **55**:4619-4630.
2. **Turnidge J.** 2003. Pharmacodynamics and dosing of aminoglycosides. *Infectious disease clinics of North America* **17**:503-528.
